# Supplementary material for: Anti-Aging and Neuroprotective Properties of Grifola frondosa and Hericium erinaceus Extracts
Source: MDPI journal article supplement (doi:10.3390/nu14204368), 2022-10-18
Supplement: s1 [file s1]

## Supplementary Materials

### Anti-aging and neuroprotective properties of *Grifola frondosa* and *Hericium erinaceus* extracts

Farida Tripodi, Ermelinda Falletta, Manuela Leri, Cristina Angeloni, Daniela Beghelli, Laura Giusti, Riccardo Milanesi, Belém Sampaio-Marques, Paula Ludovico, Lorenzo Goppa, Paola Rossi, Elena Savino, Monica Bucciantini, Paola Coccetti

#### Supplementary Tables

**Table S1. Analytes identified by GC/MS on the basis of match with NIST2014 library and the corresponding target ions used to quantify them.**

| Analyte                         |  | Target ion (m/z) |
|---------------------------------|--|------------------|
| Crotonic acid                   |  | 213              |
| Lactic acid                     |  | 266; 261         |
| 1,3-Propandiol or glycolic acid |  | 189              |
| L-Alanine + Sarcosine           |  | 260; 158         |
| Glycine                         |  | 147              |
| Hydracrylic acid                |  | 261              |
| L-Valine                        |  | 288              |
| L-Leucine                       |  | 274              |
| Isoleucine                      |  | 200              |
| L-Proline                       |  | 286              |
| L-Lysine                        |  | 272; 300         |
| Glyceric acid                   |  | 391              |
| D-Pyroglutamic acid             |  | 272              |
| L-Methionine                    |  | 292              |
| Adipic acid                     |  | 317              |
| L-Serine                        |  | 390              |

|                       |  |               |
|-----------------------|--|---------------|
| L-Threonine           |  | 303           |
| L-Phenylalanine       |  | 302; 308; 336 |
| Palmitic acid         |  | 313           |
| Aspartic acid         |  | 302; 316; 418 |
| Isovanillic acid      |  | 339           |
| L-Glutamic acid       |  | 432           |
| Azelaic acid          |  | 359           |
| Palmitic acid         |  | 313           |
| Tetradecanedioic acid |  | 429           |
| Linoelaidic acid      |  | 337           |
| Oleic acid            |  | 339           |
| Stearic acid          |  | 341           |
| Citric acid           |  | 459           |
| L-Tyrosine            |  | 302           |
| Ergosterol            |  | 363; 396      |

Table S2. Yeast strains used in this study

| Strain           | Genotype                                                     |
|------------------|--------------------------------------------------------------|
| <i>wt</i>        | <i>BY4742 MATα his3Δ1 leu2Δ0 lys2Δ0 ura3Δ0</i>               |
| <i>snf1Δ</i>     | <i>BY4742 MATα his3Δ1 leu2Δ0 lys2Δ0 ura3Δ01 snf1::HPH</i>    |
| <i>atg1Δ</i>     | <i>BY4742 MATα his3Δ1 leu2Δ0 lys2Δ0 ura3Δ01 atg1::KanMX</i>  |
| <i>ras2Δ</i>     | <i>BY4742 MATα his3Δ1 leu2Δ0 lys2Δ0 ura3Δ01 ras2::KanMX</i>  |
| <i>tor2Δ</i>     | <i>BY4742 MATα his3Δ1 leu2Δ0 lys2Δ0 ura3Δ01 tor2::KanMX</i>  |
| <i>wt[empty]</i> | <i>BY4742 MATα his3Δ1 leu2Δ0 lys2Δ0 ura3Δ0 [pYX242]</i>      |
| <i>wt[α-syn]</i> | <i>BY4742 MATα his3Δ1 leu2Δ0 lys2Δ0 ura3Δ0 [pYX242-SNCA]</i> |

Supplementary Figures

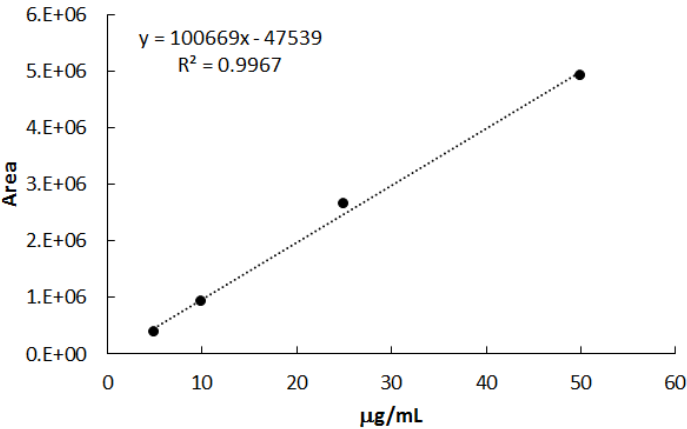

Figure S1. Calibration curve and linear regression curve for ET

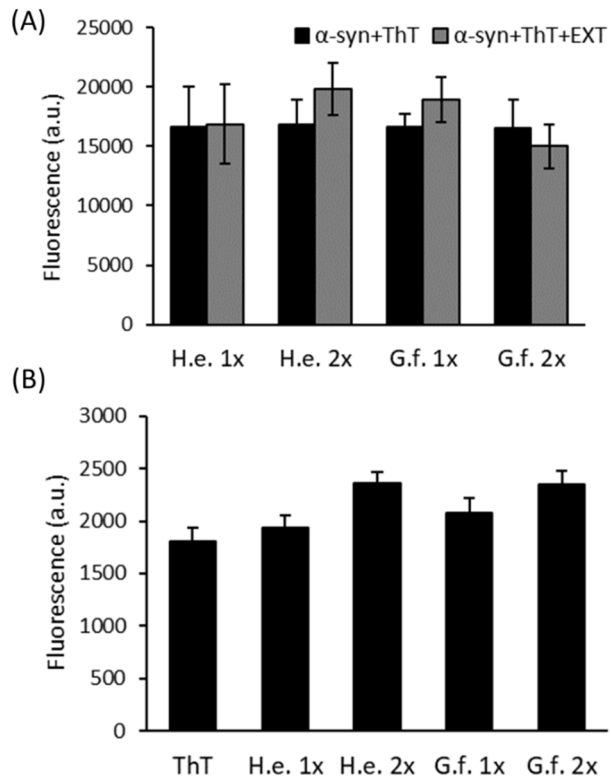

**Figure S2. Evaluation of interference of fungal extracts on ThT assay** (A) ThT fluorescence intensity recorded in the absence or in the presence of *G. frondosa* or *H. erinaceus* at two  $\alpha$ -syn:extract mass ratio (1x and 2x). (B) Addition of *G. frondosa* or *H. erinaceus* extracts, 1x and 2x, ( $\alpha$ -syn+ThT+EXT), on  $\alpha$ -syn aggregates pre-incubated with ThT probe ( $\alpha$ -syn+ThT) in order to evaluate the possible extracts quenching effects.

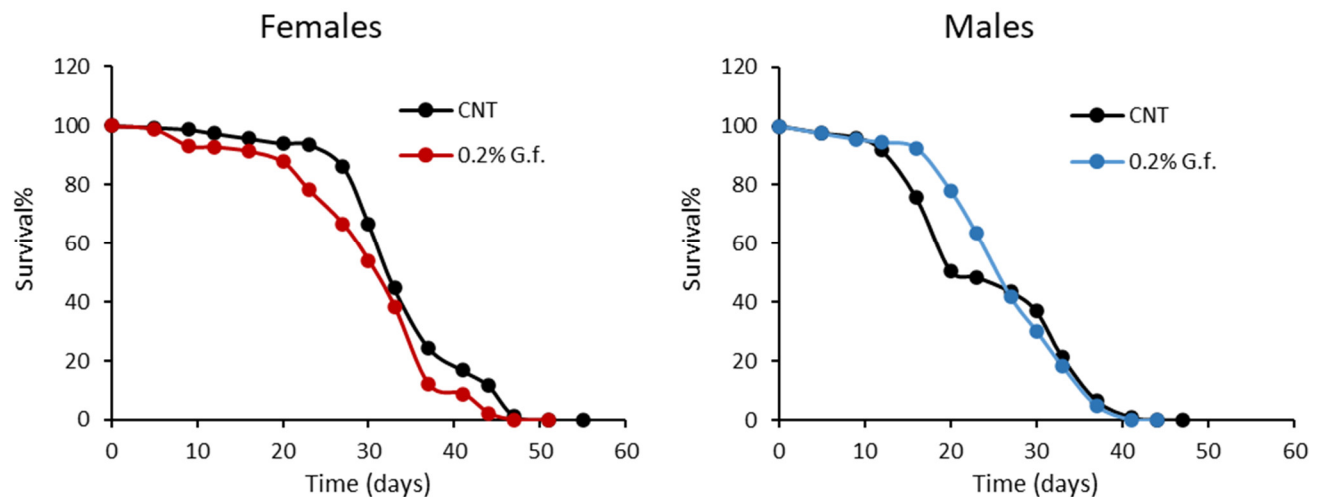

**Figure S3. High fungal extract concentrations are toxic for adult flies.** Flies were supplemented with 0.2% *G. frondosa* extract lifelong. Data are presented as a percentage of survival of flies as a function of time (in days). The Kaplan-Meier test was used to detect the significant differences among the 2 groups of flies.
